# Supplementary material for: Cepharanthine Hydrochloride Improves Cisplatin Chemotherapy and Enhances Immunity by Regulating Intestinal Microbes in Mice
Source: Front Cell Infect Microbiol. 2019 Jun 26;9:225. doi: 10.3389/fcimb.2019.00225 (PMC6606789; doi:10.3389/fcimb.2019.00225)
Supplement: Table S3 — CAZy EC (enzyme) information (top 35). [file Table_3.XLSX]

## Sheet: Sheet1
EC_ID	N	M	CDDP	CEH	Comb	Gene_Num	Gene_IDs
dTDP-L-Rha: N-acetylglucosaminyl-PP-decaprenol &alpha_-1,3-L-rhamnosyltransferase (EC 2.4.1.289)	0.003672	0.002694	0.003441	0.003065	0.002988	3561	C1_3327	G1_186340	C1_4382	H2_133917	C3_38455	C2_187083	H2_77901	F1_61299	C1_15573	D3_87551	F2_225332	D3_63353	I2_163461	H1_247829	D2_195625	D3_68783	H1_103581	I2_237161	E3_69479	I1_45260	H1_3633	D3_235534	E3_118948	H2_55818	F3_69472	G3_155479	C1_58922	E1_70999	H1_115237	I2_168030	D2_213393	C1_135033	D2_124820	I1_220608	F1_103067	D1_108369	E1_55126	F3_36265	D2_299844	G1_170674	I3_50722	D3_99846	I2_2535
GDP-Man: Man3GlcNAc2-PP-dolichol_Man4GlcNAc2-PP-dolichol &alpha_-1,2-mannosyltransferase (EC 2.4.1.131)	0.00165	0.001192	0.001452	0.001442	0.001395	1699	H3_223218	G3_153311	C1_93898	E3_118123	D2_136453	H2_108727	H1_191746	C1_122408	C1_123345	C1_13406	D3_220881	C1_127577	I2_124656	C3_13020	D3_232158	D2_45183	C1_21025	D1_120280	C1_69508	C1_120848	H3_67525	D2_259117	D2_161305	D3_256943	F1_120645	I3_130325	D1_114776	D3_44823	C1_154388	D1_162027	I2_51487	D3_128110	I3_64132	D3_140091	D2_40754	D2_216057	C1_70465	D3_48662	C2_143387	H1_134482	E3_128637	C1_29378	I2_82773
xylanase (EC 3.2.1.8)	0.00207	0.001144	0.002196	0.001952	0.001333	1246	C1_38	D3_147283	C3_77573	E3_121190	F1_134977	G1_213563	I3_159881	D3_235232	C3_135797	F3_79215	F2_171278	H2_76977	C1_159842	C1_78200	C2_25592	G3_95512	D3_71726	F1_56644	C1_54571	I2_564	F3_63411	C1_7851	F3_131617	H1_257928	F2_82526	F3_79214	D2_258588	C3_66178	D2_98748	H3_5669	F1_80479	D2_39370	F1_73697	F2_207228	C3_29765	F3_66032	E3_182583	C1_60244	C3_6412	F2_209119	C2_106953	H2_128670	G1_109677
N-acetylglucosaminyltransferase (EC 2.4.1.-)	0.003672	0.002694	0.003441	0.003065	0.002988	3561	G1_221145	D3_214762	C1_44827	F1_64710	C3_18177	F1_128588	C2_110815	D1_231026	H2_138020	I2_113500	I2_143268	D2_159107	D2_165289	H1_129712	D1_229957	C1_29482	D3_184623	D2_261224	I2_185860	H1_204863	F1_200061	D2_233230	D2_210318	F1_51110	D3_253240	F2_180385	D2_95261	G1_195316	C1_75338	C2_145721	G1_212184	C3_42038	G2_108443	C1_30993	C1_100925	I2_145738	C1_18552	C3_102103	D2_39626	I2_229736	D3_129	I2_115928	I2_186993
sucrose-phosphate synthase (EC 2.4.1.14)	0.00165	0.001192	0.001452	0.001442	0.001395	1699	H1_199729	D2_263914	H3_184898	E2_61665	H3_212732	I3_85041	F1_169948	D2_40001	C1_70102	G1_82063	H1_103439	G1_74206	G1_44803	C3_108799	H1_131022	H1_104559	F1_96406	E3_123692	H1_85271	C1_79433	F1_235407	G1_37928	I2_43547	C1_112032	D3_222250	C1_89827	D3_161732	D3_93985	D1_65129	G1_18441	F2_153035	C2_134561	I2_106901	G1_49375	H1_40131	I2_49600	C1_29967	G1_99067	F1_119874	C3_70784	C2_143015	E3_127705	I1_86573
trehalose phosphorylase (EC 2.4.1.231)	0.00165	0.001192	0.001452	0.001442	0.001395	1699	I2_232100	C3_161020	D2_238756	D2_267773	F1_54905	G1_224553	C1_21492	G1_94664	I2_206640	F3_80285	G1_95415	D1_41790	G2_105446	D1_221757	C3_140349	D2_203493	H3_57911	D1_58617	E1_112852	D3_133028	D2_292199	H1_218747	D1_229957	G1_142527	H1_135878	I2_114539	G1_213631	H3_190509	E3_121999	G3_61976	I2_46732	D2_299845	I2_222488	D1_130087	E3_92780	C1_46840	G3_15225	C2_129177	F1_84862	D2_58699	F3_144543	G1_129567	D1_102809
sucrose synthase (EC 2.4.1.13)	0.00165	0.001192	0.001452	0.001442	0.001395	1699	I3_145703	E2_87059	C1_1012	H1_204286	F3_106174	H1_177132	D3_159084	F1_31351	D1_155285	C1_15589	G3_137252	I2_159161	C1_103943	D1_231580	F3_159979	H1_172050	F3_76772	F1_51888	D2_287436	I1_210629	C2_183024	I2_214929	C1_84414	E1_80118	G1_201979	D2_43118	D2_280301	H3_77744	H1_247174	C1_111755	D2_98205	H2_106732	G3_85814	H1_192289	F2_208152	D3_177374	C1_80841	E2_87056	H3_232085	C1_38830	D3_164050	G1_200342	F1_69872
dolichyl-phosphate &beta_-D-mannosyltransferase (EC 2.4.1.83)	0.003672	0.002694	0.003441	0.003065	0.002988	3561	H1_72159	I2_133572	D2_139971	D3_187933	G1_208273	F2_80437	G1_87890	F3_123487	C2_111113	D2_116481	G1_212401	D3_269052	D3_234706	E1_21993	D3_86034	I1_139377	E2_55632	D2_86253	F1_171923	D2_148842	C1_158083	H3_61180	D2_44866	C1_61710	I1_214127	H2_142156	F1_198153	C1_25483	F1_121409	C1_48658	G3_135178	D3_216487	F2_162226	F3_41613	I2_116127	D3_44150	D3_96900	F1_124380	C1_85073	H3_209759	G1_77749	F2_79197	C2_155205
amylo-&alpha_-1,6-glucosidase (EC 3.2.1.33)	0.001649	0.001439	0.001666	0.00148	0.001492	2078	F2_109043	H1_232852	D2_20952	G3_162582	C1_111059	H1_89140	E2_131079	G1_217447	C1_81124	H3_120953	E3_168851	I2_138926	C3_86522	G3_90518	C1_86546	D3_160216	F2_195406	H3_157861	H1_210943	D2_39976	C1_8190	G2_31232	F1_136936	H3_154022	D2_200299	H2_138443	G1_117470	F2_190458	G1_214124	E2_98128	D3_221965	G1_115413	C1_56822	C2_95059	E3_136182	G1_124792	I2_103627	D2_107205	H3_32280	H3_205210	I1_102081	I2_85200	D2_164585
hyaluronan synthase (EC 2.4.1.212)	0.003672	0.002694	0.003441	0.003065	0.002988	3561	C1_95096	C1_25939	I2_200295	H1_180529	F1_124427	H1_215545	H1_150379	G1_102505	H3_98723	C1_99674	F2_207754	C2_145720	I1_188314	F3_156618	C1_74140	H1_133922	F1_227373	D1_58791	E1_69104	H1_175715	F2_215411	D1_56464	C2_93691	D2_81707	C3_75087	H1_216624	I2_61724	I1_202167	F3_106174	D2_285357	C1_80716	D2_157160	G3_152746	H1_96535	G1_170600	F1_222647	I3_68509	C2_193752	D2_33091	G1_198023	C1_42515	I1_192051	E2_146924
lipopolysaccharide N-acetylglucosaminyltransferase (EC 2.4.1.56)	0.001908	0.001351	0.001681	0.001668	0.001583	1859	G3_172416	F1_189927	F3_76773	I2_97036	C1_29521	C1_2314	D2_91563	E3_76463	C2_144226	C2_45589	C2_139289	H1_137071	C3_40993	C1_2634	D3_80280	D2_243877	G3_33964	D2_298460	C2_113267	C1_89821	C3_118687	C1_107960	C2_127233	C1_106566	D2_22913	C2_56407	E3_67925	D2_200196	I3_149638	F1_5005	I2_8040	I2_192718	D3_282993	C1_18553	D3_46476	D2_177593	D2_114657	C2_51797	H1_104141	D3_84194	C1_134015	H1_242905	E2_31222
diglucosyl diacylglycerol synthase (EC 2.4.1.208)	0.00165	0.001192	0.001452	0.001442	0.001395	1699	D3_177081	D3_102058	I3_46044	C3_96581	C2_53489	G1_94665	I2_155219	I2_214911	D3_76967	I2_82775	F1_80632	D3_213228	G1_232582	I3_23748	I2_80683	H1_60085	C1_35258	H1_209545	G1_206665	F1_219345	H3_165965	I1_102433	D1_149509	D2_277687	D2_167320	G1_119307	C2_129176	C2_31804	C1_14068	D1_139382	C1_122747	I1_37312	F1_106016	H2_153591	C1_112333	G1_73065	D2_57947	I2_49444	C1_119167	C3_3896	E2_62880	D3_79837	D3_96586
phosphatidylinositol &alpha_-mannosyltransferase (EC 2.4.1.57)	0.00165	0.001192	0.001452	0.001442	0.001395	1699	E2_57615	H3_58033	C1_107556	C1_30445	G1_6768	C1_95799	C2_23402	G1_115269	D1_123125	E3_45246	C1_117666	F3_119341	I2_128167	H1_219283	D2_254028	D3_161734	C2_147322	C2_129180	D3_161731	G1_77748	D3_250130	H2_77974	I3_132691	F3_107523	G3_170033	D3_212319	D1_123128	C3_50426	I3_148909	I2_227367	G3_195829	C1_62166	I2_215747	C1_127273	C1_120489	C1_110139	D1_29439	I2_230452	G1_74659	C1_71922	C2_36202	C1_104039	H1_40741
GDP-Man: Man2GlcNAc2-PP-dolichol &alpha_-1,6-mannosyltransferase (EC 2.4.1.257)	0.00165	0.001192	0.001452	0.001442	0.001395	1699	D2_172156	D3_226820	G1_157400	H1_142445	G1_38115	C1_88588	I3_46340	C2_35903	C1_41211	I1_135632	D2_43113	E2_100607	D2_224646	I3_133153	I2_129246	H2_110801	D3_78120	D3_287973	E3_198041	F2_104160	H1_171771	G1_181145	G1_212574	D3_216131	H1_84472	C2_60154	I2_187000	I1_169314	D2_266251	E3_113857	F1_101258	I1_158418	I3_35545	D1_123116	H1_187754	E2_128519	H1_206364	C2_23140	D2_171543	I1_96642	G1_205663	F3_127256	I2_167933
UDP-Galf: galactofuranosyl-galactofuranosyl-rhamnosyl-N-acetylglucosaminyl-PP-decaprenol &beta_-1,5_1,6-galactofuranosyltransferase (EC 2.4.1.288)	0.003672	0.002694	0.003441	0.003065	0.002988	3561	D3_85560	H3_26055	H1_187219	I1_126892	C3_64868	D3_60812	I2_169192	D2_81005	D1_225753	C1_102930	D2_298325	C2_95297	F2_103028	I1_149953	C2_95676	C1_17075	D3_50379	F2_57111	D3_91301	C1_787	C1_8367	C1_46806	E3_198038	D2_209374	I3_52747	G1_16768	I2_103553	F1_29415	D2_282114	C1_12001	C1_83364	G1_91835	F2_103582	E3_134368	H2_26857	C1_111714	C2_120185	I1_143048	F3_153349	G1_58942	C1_79755	C2_7596	D2_107908
UDP-Gal &alpha_-galactosyltransferase (EC 2.4.1.-)	0.00165	0.001192	0.001452	0.001442	0.001395	1699	D2_225603	D3_136330	H1_252417	C2_18316	C1_159606	G1_56318	I2_142137	D3_173419	G3_32587	G1_115658	H3_231992	F3_4451	I1_53755	D2_121053	C1_132893	C1_17841	I2_56233	C1_70152	G3_19153	D2_234468	H1_231805	I2_15216	E2_7260	C2_34499	C1_45657	D2_60196	E3_28316	G1_118355	I3_147916	I2_165789	D3_147051	H1_69693	H1_198284	I2_20701	H3_199483	D3_81173	C1_130951	C1_96266	C1_16357	I2_173888	D1_171011	E3_142499	D3_122519
UDP-Glc &alpha_-glucosyltransferase (EC 2.4.1.-)	0.00165	0.001192	0.001452	0.001442	0.001395	1699	F2_74587	C1_46775	I2_224094	H1_73880	H1_261007	D2_202764	D2_180250	C1_17073	H1_175536	C3_25349	C3_58297	H1_69341	I1_180391	H3_161701	D1_142480	C1_70160	E3_142242	G1_242570	E3_109300	C2_112304	C3_60248	D2_134998	D2_177846	I3_68746	H1_226867	I1_111560	D3_283292	I2_54777	G1_205656	I1_171024	I2_199992	D3_253929	C3_84851	C1_37775	H2_145079	C1_71918	I2_132531	G1_216318	E3_149992	C1_29966	C3_51926	I2_3497	D2_146509
arabinanase (EC 3.2.1.99)	0.00207	0.001144	0.002196	0.001952	0.001333	1246	F2_191162	I1_73146	C2_35734	F2_169122	I2_170849	C1_88953	I2_16630	G1_187569	I1_200884	F2_185367	C1_20743	D2_132157	D2_161088	C2_187521	C2_45376	F1_211050	C2_38503	C2_78593	H3_102562	E2_47544	I1_192316	F1_233719	D1_55756	C1_18492	C1_131132	D2_252938	G3_31447	C2_179896	I1_206134	D2_26751	D2_248369	G1_43412	F1_188192	D3_275124	G1_92409	H3_170630	H1_83805	C1_680	C1_105812	H2_4086	G1_197857	C1_133409	D2_249313
NDP-Glc: &alpha_-glucose &alpha_-glucosyltransferase _ &alpha_,&alpha_-trehalose synthase (EC 2.4.1.245)	0.00165	0.001192	0.001452	0.001442	0.001395	1699	F1_62689	G3_57707	D3_122130	D2_101984	H1_229530	C1_132900	G2_31089	F1_81297	H3_40050	C1_82045	C1_96583	D2_161747	D3_100846	D2_133731	C3_74350	H3_235201	D1_49662	H1_48074	G3_146069	D3_179577	G1_223828	H1_233572	H3_127050	C1_95102	D1_173355	H3_135248	F2_172201	C3_10340	H1_249647	C2_18363	C3_102704	G1_67141	F2_177387	H1_144477	F1_56379	D3_42849	F1_186126	I2_230016	C1_34206	C3_115124	I2_100892	E1_2076	D2_211250
chitin synthase (EC 2.4.1.16)	0.003672	0.002694	0.003441	0.003065	0.002988	3561	D1_22415	C1_32026	D3_269689	D2_93606	C1_61836	C2_26498	H2_165092	D2_202662	F2_111448	C3_86266	D3_248340	C1_29351	C1_108463	D2_212366	I2_85828	F1_706	G3_154002	I1_67034	D3_154144	I2_143264	C1_231	I3_41635	F2_169996	H1_96178	D2_284965	F3_25422	H3_135245	G3_138360	F3_132535	F2_119275	C1_108164	D1_184432	I2_47273	C3_13098	C3_148852	D3_5916	D3_104570	G1_206879	F2_58444	I2_118957	D2_225287	C2_37220	F1_86976
galactan 1,3-&beta_-galactosidase (EC 3.2.1.145)	0.00207	0.001144	0.002196	0.001952	0.001333	1246	F2_215149	F1_229936	C1_130695	D1_99116	F2_202853	H3_155011	D2_224467	C2_171942	D3_2813	G3_167053	I3_162086	D1_1910	C2_21526	F1_113416	G1_215576	C1_5652	C1_65851	D1_7873	H1_260892	C1_80479	D2_229115	C3_86404	C1_112692	G3_65583	E2_53824	D3_279001	C1_671	E3_65881	I1_218028	H3_63251	C1_23128	D1_178494	C1_115028	F3_67738	I1_51807	F2_69864	E3_186840	H1_138774	C1_52811	E2_77098	C1_94250	G3_37587	I1_77946
dolichyl-phosphate &beta_-glucosyltransferase (EC 2.4.1.117)	0.003672	0.002694	0.003441	0.003065	0.002988	3561	D2_105269	D3_61617	I2_50506	F2_65167	D1_22440	I2_97802	G1_208991	D2_164038	D2_281691	C2_74675	C1_44849	D3_182893	F1_82196	E3_164966	I2_196156	D3_176264	D2_292463	D3_260244	C1_54620	D1_37618	D3_173731	I2_112626	H3_216652	H3_26056	I2_202489	C1_114921	C3_93241	H3_152675	G1_52903	D2_183646	D1_1033	C1_60542	C1_93670	D1_229170	I2_58142	H2_126850	D3_168979	D3_91214	H1_178775	D3_225745	G1_63195	C1_116325	F2_85191
GDP-Man: Man1GlcNAc2-PP-dolichol &alpha_-1,3-mannosyltransferase (EC 2.4.1.132)	0.00165	0.001192	0.001452	0.001442	0.001395	1699	H1_48374	D2_77337	C2_103683	C2_59151	G1_185340	D2_158751	G3_33146	H1_94436	E3_19324	D1_137803	G3_196466	H2_25971	C1_64551	C1_137305	G1_196243	F1_38128	I3_136961	D3_122518	H1_2088	C2_86571	H2_106171	I3_85899	F2_177957	G1_178635	F1_166269	D3_200657	F1_99309	I1_45255	C1_16676	C1_4524	C1_157711	H1_109300	C3_101758	E2_87052	C2_18338	H1_216607	H1_112389	G1_157562	D2_17575	I1_186803	G2_56952	G1_242273	D1_130086
1,2-diacylglycerol 3-glucosyltransferase (EC 2.4.1.157)	0.00165	0.001192	0.001452	0.001442	0.001395	1699	H2_161268	E3_134544	D2_38250	G3_41019	G1_82737	I2_87202	F2_157904	C2_115194	D2_198543	G1_14770	I2_9281	H3_150379	F1_146023	C1_45656	H1_138309	C2_47662	G1_207288	H1_58910	E2_131502	F2_148857	H1_187734	C1_103970	D1_40253	F2_8170	H1_195114	H1_81042	C1_44171	I2_58822	D2_45184	C1_52588	G3_86799	C1_129076	C1_28522	D3_268815	H2_81249	F1_114738	D2_287403	I3_64133	D2_77027	F2_174584	F2_158678	C1_159349	G1_175117
chitin oligosaccharide synthase (EC 2.4.1.-)	0.003672	0.002694	0.003441	0.003065	0.002988	3561	D2_285357	F3_106174	C1_80716	I1_202167	G3_152746	D2_157160	F1_222647	G1_170600	H1_96535	C2_93691	C3_75087	D2_81707	H1_216624	I2_61724	I2_88797	C1_94948	I1_147497	D1_87740	E1_90067	C3_169780	C2_193752	I3_68509	I1_192051	C1_42515	G1_198023	D2_33091	E2_146924	H1_49202	F1_124427	H1_215545	H1_150379	H1_180529	G1_102505	H3_98723	C1_99674	F2_207754	C1_95096	C1_25939	I2_200295	D1_58791	H1_175715	E1_69104	D1_56464
cellulose synthase (EC 2.4.1.12)	0.003672	0.002694	0.003441	0.003065	0.002988	3561	H1_178525	C1_98203	C1_17803	D1_146239	I1_35199	E2_34585	H2_25534	C1_42762	G1_56622	I2_75526	F2_156225	D1_115226	C2_127479	D3_243908	H3_65260	D2_102360	C1_69516	H1_41378	D3_286928	E3_138535	C1_43622	C1_101881	I2_149165	D1_160053	I1_108110	H1_147990	D2_222091	D2_131798	F1_78656	I3_19492	C1_144027	F2_186590	H3_231857	D2_174677	H1_179505	C1_4513	F1_17313	I2_152675	I3_38330	G1_124083	D2_222377	C1_135929	H1_174427
UDP-GlcA &alpha_-glucuronyltransferase (EC 2.4.1.-)	0.00165	0.001192	0.001452	0.001442	0.001395	1699	F3_4451	H3_231992	I1_53755	G3_32587	I2_142137	D3_173419	G1_56318	G1_115658	C2_18316	H1_252417	C1_159606	D3_136330	D2_225603	H1_231805	E2_7260	I2_15216	D2_234468	G3_19153	C1_17841	I2_56233	C1_70152	C1_132893	D2_121053	I2_20701	H3_199483	H1_69693	D3_147051	I2_165789	H1_198284	G1_118355	E3_28316	I3_147916	C2_34499	D2_60196	C1_45657	G3_40464	C2_66191	D2_182313	D3_190887	D3_122519	C2_179144	E1_60563	E3_137169
UDP-GlcNAc: 2-deoxystreptamine &alpha_-N-acetylglucosaminyltransferase (EC 2.4.1.283)	0.00165	0.001192	0.001452	0.001442	0.001395	1699	C2_128544	I2_90673	G1_178942	C1_88569	D3_122807	C2_129186	D2_299881	I2_214912	D2_224129	D1_120281	E2_144127	D3_209341	D1_54495	D3_103567	H3_202678	D3_97017	D3_222249	D3_131523	C2_146202	C1_123535	I2_88278	I3_93984	I2_69910	I1_221610	H3_65665	C1_33969	E2_65010	H1_72453	D3_272412	F1_163686	D2_50542	C3_47701	H1_180435	F1_43707	F2_219480	I2_165863	E3_146106	D2_94756	G1_199973	H1_186762	C2_197626	G1_99046	F1_156077
UDP-Galf: rhamnopyranosyl-N-acetylglucosaminyl-PP-decaprenol &beta_-1,4_1,5-galactofuranosyltransferase (EC 2.4.1.287)	0.003672	0.002694	0.003441	0.003065	0.002988	3561	C1_44827	F1_64710	G1_221145	D3_214762	C3_18177	D1_231026	C2_110815	F1_128588	I2_143268	I2_113500	H2_138020	D2_165289	D2_159107	D2_261224	D3_184623	C1_29482	D1_229957	H1_129712	F1_200061	H1_204863	I2_185860	D2_233230	D2_210318	F1_51110	D2_95261	F2_180385	D3_253240	C2_145721	G1_212184	C1_75338	G1_195316	C1_18552	I2_145738	C1_100925	G2_108443	C1_30993	C3_42038	D3_129	I2_229736	D2_39626	C3_102103	I2_186993	I2_115928
exo-&alpha_-1,5-L-arabinofuranosidase (EC 3.2.1.-)	0.00207	0.001144	0.002196	0.001952	0.001333	1246	E1_36531	C2_28115	F1_128282	C1_25912	D1_110107	C1_68245	C1_91305	F3_39693	D1_17315	C3_59632	C1_50406	C3_131731	C1_20741	F1_179051	F2_189613	D2_213486	C3_97962	H3_140515	I2_197883	H3_216427	F2_156262	G3_97533	I2_101969	H2_89418	E3_122695	C1_107709	C1_6173	D1_124844	C1_114082	D2_263297	C1_110504	F1_78793	D3_183826	I1_175945	D2_166929	H1_191689	H3_203989	C1_115616	I2_223610	D3_43804	F2_158390	I1_190250	C1_77533
UDP-GlcNAc: ribostamycin &alpha_-N-acetylglucosaminyltransferase (EC 2.4.1.285)	0.00165	0.001192	0.001452	0.001442	0.001395	1699	D1_36158	C2_122614	D1_154656	G3_138247	D2_85743	F1_150277	C2_79680	F1_150121	F1_61328	D2_172144	I2_190896	C1_28521	I1_207642	G1_125411	H1_261008	D3_233358	C3_103442	D2_211244	I2_133570	F2_115205	C3_98461	E1_61704	G1_138166	F1_99308	C3_96920	D1_123122	D2_242179	C1_132889	C3_54564	F1_123158	E2_77087	D2_39989	C3_75917	C1_120421	F2_199233	E3_72126	D1_233944	H1_180673	E2_97533	C2_130307	C3_181207	D2_93911	C1_14155
exo-&beta_-glucosaminidase (EC 3.2.1.165)	0.001919	0.001228	0.001758	0.001829	0.001297	1800	H2_103256	F1_191346	E3_100832	C1_8879	C1_75966	D3_280540	C1_5390	F3_118312	C1_28004	I1_150031	H1_51232	C1_103462	G1_247773	C2_110648	C3_90049	I1_167473	G1_177353	C1_158314	G2_125050	H1_134453	I2_132302	C1_61412	I2_103353	D2_32936	C1_88648	D1_67227	C2_108811	I1_175749	C1_94281	I3_21243	D2_220050	G1_118399	C1_30782	E3_109688	I3_79711	I2_49439	F1_175452	D3_52881	H1_214600	F3_131895	D2_241239	G3_132240	C3_58359
[inverting] exo-&alpha_-1,5-L-arabinanase (EC 3.2.1.-)	0.00207	0.001144	0.002196	0.001952	0.001333	1246	H3_237454	C1_91316	C1_9279	C1_52811	E2_77098	C1_94250	G3_37587	I1_77946	D2_144354	H3_105250	I1_33073	F2_157988	D1_100793	D3_9352	G1_37588	E2_115656	F1_134453	C1_72457	D1_232297	I1_80865	E3_127528	C1_54662	D1_81519	H1_156394	D2_72348	D2_293930	E2_144749	C1_10659	H1_252482	D3_284416	F1_130968	C1_6905	D3_146213	C1_128028	D2_253277	I2_121972	G3_167053	D3_2813	C2_171942	I3_162086	D1_1910	F2_215149	F1_229936
UDP-Xyl &alpha_-xylosyltransferase (EC 2.4.2.-)	0.00165	0.001192	0.001452	0.001442	0.001395	1699	H3_191102	C3_35350	C1_110140	H2_52483	H3_164011	I2_201694	C3_143472	C1_11041	G1_196418	I3_65957	I2_208740	I2_63866	I2_117645	D2_73309	D2_288783	I3_81639	D1_123088	I2_219437	H1_226390	C3_81354	D2_131797	I1_155338	E2_31221	I2_141708	D3_237069	I2_159098	D3_124634	H1_60120	H1_85961	H1_106402	H1_67215	G1_131878	C3_62901	C1_7950	C2_178356	C1_48997	I2_108482	F2_181618	I2_233704	D2_222695	E2_49416	I2_207042	H1_183768
N-acetylgalactosaminyltransferase (EC 2.4.1.-)	0.003672	0.002694	0.003441	0.003065	0.002988	3561	D2_146517	D2_203424	H1_153585	I1_182101	E3_150013	D2_100798	D3_191553	I2_243988	I2_129235	D1_60328	I2_159097	H3_49351	E2_132943	I2_214634	C2_8616	C2_114417	H1_219073	H1_229870	E3_198036	I2_226432	E2_84890	C1_69558	E2_141901	D2_238755	I1_103970	I3_142569	D2_118934	C1_126773	D1_13316	G1_139982	D3_215035	G2_46689	D2_299873	E2_134542	C3_73854	F2_166715	C1_125339	C1_138169	G1_53349	D1_153869	F1_53597	D3_85426	C2_43204
[truncated: 3,518 more columns]
